# Supplementary material
Source: Springer Nature journal article supplement (https://www.springermedizin.de/resource/supplementary/12993_2009_216_MOESM1_ESM.pdf/9617310)

## FAs distribution (%)

(0.75 c/deg target)

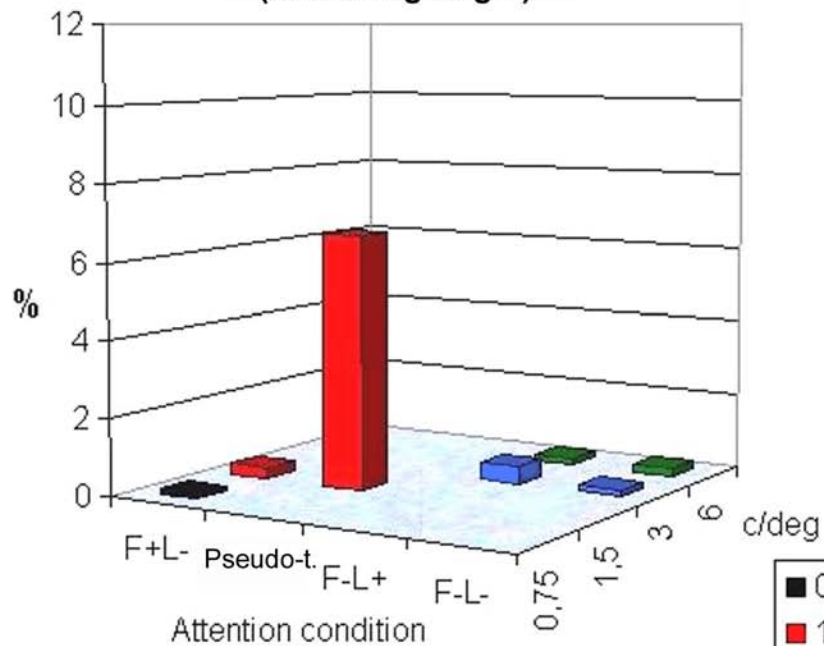

(6 c/deg target)

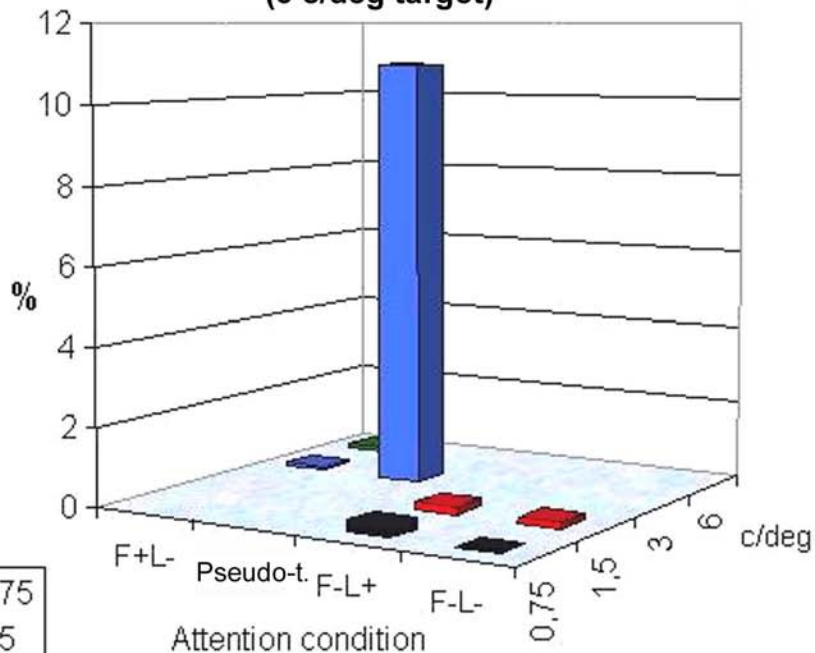

Supplement: MOESM1 [file 9617310]
